# Supplementary material for: The Role of piRNA-Mediated Epigenetic Silencing in the Population Dynamics of Transposable Elements in Drosophila melanogaster
Source: PubMed Central journal article supplement (PMC4456100; doi:10.1371/journal.pgen.1005269), 2015-06-04

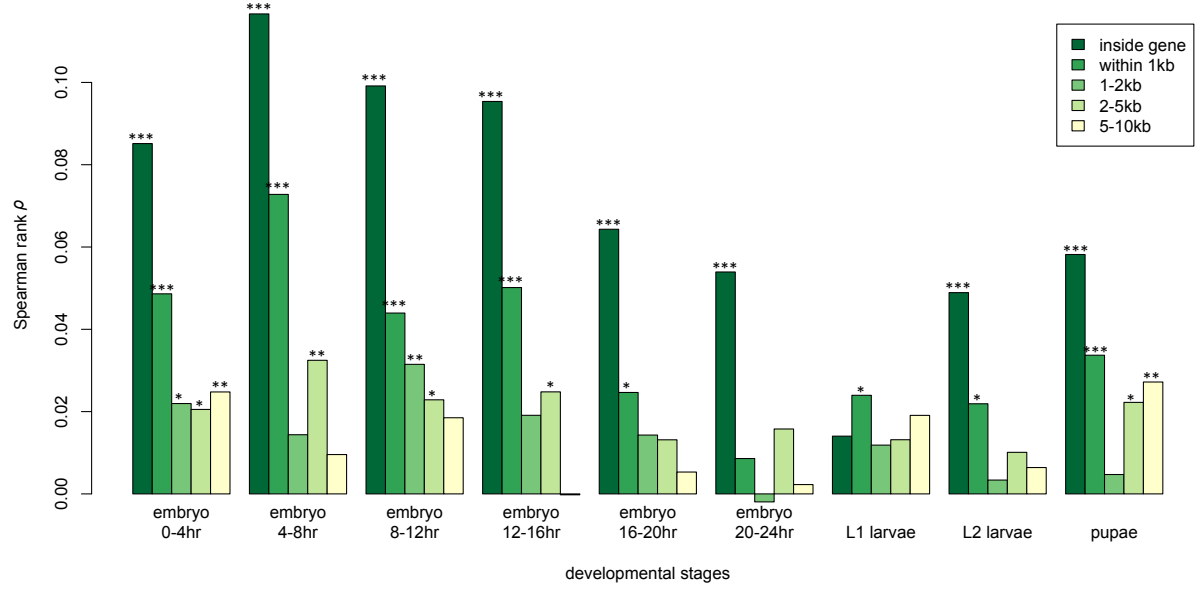

Supplement: pgen.1005269.s009.pdf [file pgen.1005269.s009.pdf]
