# Supplementary material for: The Role of piRNA-Mediated Epigenetic Silencing in the Population Dynamics of Transposable Elements in Drosophila melanogaster
Source: PubMed Central journal article supplement (PMC4456100; doi:10.1371/journal.pgen.1005269), 2015-06-04
Supplement: pgen.1005269.s014.pdf [file pgen.1005269.s014.pdf]

| developmental stage | 0-1kb  |           | 1-2kb  |           | 2-3kb  |           | 3-4kb  |           | 4-5kb  |           |
|---------------------|--------|-----------|--------|-----------|--------|-----------|--------|-----------|--------|-----------|
|                     | median | p-value   | median | p-value   | median | p-value   | median | p-value   | median | p-value   |
| embryo 0-4hr        | 2.6316 | 9.519E-05 | 2.2574 | 2.114E-03 | 1.9675 | 9.114E-03 | 1.6337 | 1.064E-01 | 1.8851 | 8.000E-02 |
| embryo 4-8hr        | 6.7738 | 4.681E-09 | 4.7589 | 1.941E-03 | 4.4276 | 8.119E-03 | 3.8885 | 7.576E-02 | 3.8368 | 9.066E-02 |
| embryo 8-12hr       | 3.5904 | 4.149E-05 | 3.4315 | 4.992E-04 | 2.8078 | 1.347E-02 | 2.3596 | 8.409E-02 | 2.0090 | 3.868E-01 |
| embryo 12-16hr      | 5.8160 | 7.086E-07 | 5.0795 | 1.575E-04 | 4.3718 | 8.794E-04 | 3.9895 | 3.058E-02 | 4.1035 | 8.777E-03 |
| embryo 16-20hr      | 4.1875 | 4.518E-05 | 3.6643 | 2.444E-03 | 3.2152 | 2.557E-02 | 2.4502 | 1.240E-01 | 2.5313 | 8.753E-02 |
| embryo20-24hr       | 1.1186 | 6.242E-03 | 1.2096 | 3.931E-03 | 1.1196 | 1.278E-02 | 1.0854 | 3.314E-02 | 1.0225 | 5.784E-02 |
| L1 larva            | 1.4219 | 3.001E-05 | 1.1507 | 1.139E-02 | 1.0497 | 1.265E-01 | 1.0328 | 2.268E-01 | 0.9980 | 3.059E-01 |
| L2 larva            | 5.5370 | 2.210E-04 | 5.4851 | 6.972E-04 | 4.7067 | 5.627E-02 | 4.4303 | 1.908E-01 | 4.7577 | 1.467E-01 |
| Pupae               | 1.4963 | 1.194E-03 | 1.3588 | 3.043E-03 | 1.2179 | 6.407E-02 | 1.0758 | 1.930E-01 | 1.1999 | 2.114E-01 |

| developmental stage | 5-6kb  |           | 6-7kb  |           | 7-8kb  |           | 8-9kb  |           | 9-10kb |
|---------------------|--------|-----------|--------|-----------|--------|-----------|--------|-----------|--------|
|                     | median | p-value   | median | p-value   | median | p-value   | median | p-value   | median |
| embryo 0-4hr        | 1.9222 | 7.097E-02 | 1.6023 | 5.613E-01 | 1.6340 | 6.230E-01 | 1.5938 | 6.398E-01 | 1.5441 |
| embryo 4-8hr        | 3.3164 | 2.891E-01 | 3.0432 | 5.840E-01 | 3.1193 | 6.430E-01 | 2.7966 | 8.309E-01 | 3.0157 |
| embryo 8-12hr       | 2.1448 | 4.204E-01 | 1.9883 | 6.403E-01 | 1.6762 | 8.295E-01 | 1.9688 | 9.364E-01 | 1.6719 |
| embryo 12-16hr      | 4.4053 | 9.981E-03 | 3.6620 | 2.214E-01 | 3.5245 | 4.362E-01 | 3.6015 | 4.430E-01 | 3.1981 |
| embryo 16-20hr      | 2.6818 | 1.714E-01 | 2.6245 | 2.381E-01 | 2.2213 | 3.870E-01 | 2.4635 | 4.420E-01 | 1.9718 |
| embryo20-24hr       | 1.0689 | 4.457E-02 | 0.9664 | 3.214E-01 | 0.9952 | 3.653E-01 | 0.8284 | 6.441E-01 | 0.8585 |
| L1 larva            | 0.9274 | 5.778E-01 | 0.8811 | 8.177E-01 | 0.8469 | 6.975E-01 | 0.9004 | 8.101E-01 | 0.8650 |
| L2 larva            | 4.5326 | 3.052E-01 | 4.4402 | 1.999E-01 | 4.1809 | 3.752E-01 | 4.3704 | 4.293E-01 | 4.1762 |
| Pupae               | 1.1956 | 4.450E-01 | 1.0109 | 7.630E-01 | 0.9800 | 8.947E-01 | 1.0336 | 9.301E-01 | 0.9761 |
