# Supplementary material for: The Role of piRNA-Mediated Epigenetic Silencing in the Population Dynamics of Transposable Elements in Drosophila melanogaster
Source: PubMed Central journal article supplement (PMC4456100; doi:10.1371/journal.pgen.1005269), 2015-06-04
Supplement: pgen.1005269.s015.pdf [file pgen.1005269.s015.pdf]

| H3K9me3 density vs distance to TE |         |                |
|-----------------------------------|---------|----------------|
| developmental stage               | $\rho$  | <i>p-value</i> |
| Embryo 0-4hr                      | -0.1330 | $< 10^{-16}$   |
| Embryo 4-8hr                      | -0.1894 | $< 10^{-16}$   |
| Embryo 8-12hr                     | -0.1491 | $< 10^{-16}$   |
| Embryo 12-16hr                    | -0.1559 | $< 10^{-16}$   |
| Embryo 16-20hr                    | -0.1023 | 7.12E-09       |
| Embryo20-24hr                     | -0.0661 | 1.88E-04       |
| L1 larvae                         | -0.0399 | 2.43E-02       |
| L2 Larvae                         | -0.0560 | 1.55E-03       |
| Pupae                             | -0.0875 | 7.35E-07       |
