# Supplementary material for: The Role of piRNA-Mediated Epigenetic Silencing in the Population Dynamics of Transposable Elements in Drosophila melanogaster
Source: PubMed Central journal article supplement (PMC4456100; doi:10.1371/journal.pgen.1005269), 2015-06-04
Supplement: pgen.1005269.s016.pdf [file pgen.1005269.s016.pdf]

|                                | comparison of <i>piRNA</i> density |       |                            | correlation with genic H3K9me3 density |                     |        |                |
|--------------------------------|------------------------------------|-------|----------------------------|----------------------------------------|---------------------|--------|----------------|
|                                | median                             |       | <i>Mann-Whitney U test</i> | gene                                   |                     | TE     |                |
|                                | gene                               | TE    |                            | $\rho$                                 | <i>p-value</i>      | $\rho$ | <i>p-value</i> |
| <b>sense <i>piRNA</i></b>      | 0.0537                             | 0.256 | < 10 <sup>-16</sup>        | -0.180                                 | < 10 <sup>-16</sup> | 0.0428 | 1.6E-02        |
| <b>anti-sense <i>piRNA</i></b> | 0                                  | 0.186 | < 10 <sup>-16</sup>        | -0.0376                                | 7.1E-05             | 0.0838 | 2.2E-06        |
