# Supplementary material for: The Role of piRNA-Mediated Epigenetic Silencing in the Population Dynamics of Transposable Elements in Drosophila melanogaster
Source: PubMed Central journal article supplement (PMC4456100; doi:10.1371/journal.pgen.1005269), 2015-06-04
Supplement: pgen.1005269.s017.pdf [file pgen.1005269.s017.pdf]

| H3K9me3        | expression       | all genes  |                     | genes with TE in 10kb |                     |
|----------------|------------------|------------|---------------------|-----------------------|---------------------|
|                |                  | $\rho$     | $p$ -value          | $\rho$                | $p$ -value          |
| embryo 0-4hr   | embryo 0-2hr     | -1.308E-01 | < 10 <sup>-16</sup> | -1.383E-01            | 2.4E-09             |
|                | embryo 2-4hr     | -1.521E-01 | < 10 <sup>-16</sup> | -1.719E-01            | 5.0E-15             |
| embryo 4-8hr   | embryo 4-6hr     | -1.371E-01 | < 10 <sup>-16</sup> | -1.716E-01            | 2.7E-15             |
|                | embryo 6-8hr     | -1.276E-01 | < 10 <sup>-16</sup> | -1.458E-01            | 6.1E-12             |
| embryo 8-12hr  | embryo 8-10hr    | 1.157E-02  | 3.0E-01             | -1.368E-02            | 5.1E-01             |
|                | embryo 10-12hr   | 2.962E-03  | 7.9E-01             | -3.489E-02            | 8.9E-02             |
| embryo 12-16hr | embryo 12-14hr   | -2.261E-01 | < 10 <sup>-16</sup> | -2.329E-01            | < 10 <sup>-16</sup> |
|                | embryo 14-16hr   | -2.479E-01 | < 10 <sup>-16</sup> | -2.463E-01            | < 10 <sup>-16</sup> |
| embryo 16-20hr | embryo 16-18hr   | -3.898E-02 | 2.6E-04             | -3.895E-02            | 4.7E-02             |
|                | embryo 18-20hr   | 1.576E-02  | 1.4E-01             | 1.965E-02             | 3.1E-01             |
| embryo20-24hr  | embryo 20-22hr   | -2.935E-02 | 5.7E-03             | -3.959E-04            | 9.8E-01             |
|                | embryo 22-24hr   | -4.742E-02 | 6.9E-06             | -1.141E-02            | 5.5E-01             |
| L1 larva       | L1 larva         | -1.397E-01 | < 10 <sup>-16</sup> | -9.866E-02            | 3.9E-07             |
| L2 larva       | L2 larva         | -9.249E-02 | < 10 <sup>-16</sup> | -7.793E-02            | 6.5E-05             |
| Pupae          | pupae 2d postWPP | -8.455E-02 | < 10 <sup>-16</sup> | -5.419E-02            | 1.9E-03             |
