# Supplementary material for: The Role of piRNA-Mediated Epigenetic Silencing in the Population Dynamics of Transposable Elements in Drosophila melanogaster
Source: PubMed Central journal article supplement (PMC4456100; doi:10.1371/journal.pgen.1005269), 2015-06-04
Supplement: pgen.1005269.s018.pdf [file pgen.1005269.s018.pdf]

| developmental stage       | median gene expression level of genes |     |      |     |      |            | Mann-Whitney U test p-value |         |         |         |         |
|---------------------------|---------------------------------------|-----|------|-----|------|------------|-----------------------------|---------|---------|---------|---------|
|                           | with TE nearby                        |     |      |     |      | without TE | in gene                     | 1kb     | 2kb     | 5kb     | 10kb    |
|                           | in gene                               | 1kb | 2kb  | 5kb | 10kb | nearby     |                             |         |         |         |         |
| embryo 0-2hr              | 21.5                                  | 25  | 27   | 28  | 29   | 33         | 1.8E-08                     | 9.4E-09 | 6.2E-06 | 9.9E-06 | 3.1E-03 |
| embryo 2-4hr              | 12                                    | 14  | 14   | 15  | 16   | 18         | 1.5E-05                     | 1.4E-05 | 1.6E-05 | 6.8E-05 | 5.2E-03 |
| embryo 4-6hr              | 12                                    | 14  | 14   | 15  | 16   | 18         | 5.1E-06                     | 2.0E-07 | 5.0E-07 | 1.3E-05 | 5.8E-03 |
| embryo 6-8hr              | 14                                    | 14  | 15   | 15  | 16   | 18         | 4.5E-04                     | 5.7E-06 | 4.4E-06 | 3.7E-05 | 1.2E-02 |
| embryo 8-10hr             | 14                                    | 14  | 15   | 15  | 16   | 17         | 1.5E-03                     | 9.7E-05 | 1.0E-04 | 1.3E-04 | 8.1E-03 |
| embryo 10-12hr            | 12                                    | 13  | 13.5 | 14  | 14   | 16         | 3.6E-05                     | 1.9E-05 | 3.5E-05 | 1.6E-04 | 5.9E-03 |
| embryo 12-14hr            | 14                                    | 13  | 13   | 13  | 13   | 15         | 6.6E-02                     | 7.5E-03 | 6.6E-03 | 2.0E-03 | 1.1E-02 |
| embryo 14-16hr            | 13                                    | 12  | 12   | 12  | 12   | 14         | 1.5E-01                     | 1.1E-02 | 4.9E-03 | 8.9E-03 | 3.1E-02 |
| embryo 16-18hr            | 13                                    | 13  | 13   | 12  | 13   | 13         | 5.2E-01                     | 6.9E-01 | 5.6E-01 | 3.9E-01 | 5.2E-01 |
| embryo 18-20hr            | 13                                    | 12  | 12   | 12  | 12   | 11         | 3.2E-01                     | 1.6E-01 | 2.8E-01 | 3.3E-01 | 1.1E-01 |
| embryo 20-22hr            | 11                                    | 12  | 12   | 12  | 12   | 12         | 3.2E-01                     | 7.7E-01 | 5.6E-01 | 3.4E-01 | 1.1E-01 |
| embryo 22-24hr            | 13                                    | 13  | 13   | 13  | 13   | 13         | 5.2E-01                     | 4.6E-01 | 3.1E-01 | 1.1E-01 | 5.8E-02 |
| L1 larva                  | 8                                     | 9   | 10   | 11  | 11   | 11         | 8.2E-06                     | 3.1E-02 | 1.6E-01 | 6.0E-01 | 4.8E-01 |
| L2 larva                  | 6                                     | 8   | 8    | 10  | 10   | 11         | 3.3E-18                     | 6.6E-08 | 6.2E-06 | 4.2E-03 | 3.8E-01 |
| L3 larva 12hr old         | 6                                     | 7   | 8    | 9   | 9    | 9.5        | 1.1E-17                     | 1.9E-05 | 1.7E-03 | 2.6E-01 | 3.8E-01 |
| L3 larva puff stage 1-2   | 5                                     | 7   | 7    | 7   | 8    | 8          | 1.2E-09                     | 1.2E-02 | 5.5E-02 | 8.8E-01 | 2.6E-01 |
| L3 larva puff stage 3-6   | 8.5                                   | 9   | 9    | 10  | 10   | 10         | 3.6E-07                     | 6.8E-03 | 3.7E-02 | 4.4E-01 | 6.8E-01 |
| L3 larva puff stage 7-9   | 10                                    | 11  | 11   | 12  | 12   | 12         | 7.8E-06                     | 3.7E-03 | 2.2E-02 | 2.3E-01 | 9.6E-01 |
| white prepupae new        | 11                                    | 11  | 11   | 11  | 11   | 11         | 1.9E-02                     | 7.2E-02 | 1.8E-01 | 4.7E-01 | 6.2E-01 |
| white prepupae 12hr       | 12                                    | 12  | 13   | 13  | 13   | 13         | 2.4E-03                     | 3.3E-02 | 1.3E-01 | 2.2E-01 | 9.0E-01 |
| white prepupae 24hr       | 13                                    | 13  | 13   | 13  | 14   | 15         | 8.5E-04                     | 2.0E-04 | 1.8E-03 | 5.3E-03 | 1.3E-01 |
| pupae 2d postWPP          | 14                                    | 13  | 14   | 14  | 14   | 14         | 5.5E-02                     | 1.0E-02 | 2.9E-02 | 2.3E-02 | 2.1E-01 |
| pupae 3d postWPP          | 10                                    | 10  | 10   | 10  | 11   | 11         | 4.0E-03                     | 1.7E-03 | 4.3E-03 | 7.1E-03 | 2.6E-01 |
| pupae 4d postWPP          | 8                                     | 8   | 9    | 9   | 10   | 10         | 2.1E-04                     | 7.0E-05 | 2.7E-03 | 7.7E-03 | 3.7E-01 |
| adult fembryo ale 1 day   | 9                                     | 11  | 12   | 12  | 13   | 14         | 4.3E-14                     | 2.0E-08 | 8.8E-06 | 8.0E-05 | 3.3E-02 |
| adult fembryo ale 5 days  | 11                                    | 15  | 16   | 17  | 18   | 20         | 4.1E-13                     | 1.6E-07 | 5.3E-05 | 7.6E-04 | 5.4E-02 |
| adult fembryo ale 30 days | 11                                    | 15  | 16   | 18  | 19   | 21         | 1.2E-14                     | 7.3E-09 | 1.0E-05 | 2.0E-04 | 2.1E-02 |
| adult male                | 8                                     | 10  | 11   | 11  | 12   | 13         | 6.5E-12                     | 1.1E-05 | 1.6E-03 | 1.6E-02 | 4.1E-01 |
| adult male 5 days         | 8                                     | 11  | 12   | 12  | 13   | 14         | 6.7E-14                     | 1.3E-05 | 6.2E-03 | 4.8E-02 | 6.5E-01 |
| adult male 30 days        | 8                                     | 10  | 11   | 12  | 12   | 13         | 2.5E-14                     | 4.1E-07 | 8.7E-04 | 8.6E-03 | 2.7E-01 |
