# Supplementary material for: The Role of piRNA-Mediated Epigenetic Silencing in the Population Dynamics of Transposable Elements in Drosophila melanogaster
Source: PubMed Central journal article supplement (PMC4456100; doi:10.1371/journal.pgen.1005269), 2015-06-04
Supplement: pgen.1005269.s021.pdf [file pgen.1005269.s021.pdf]

| window size<br>with TE | no. significant gene |        |      | <i>FET test</i> |            |
|------------------------|----------------------|--------|------|-----------------|------------|
|                        | both                 | female | male | <i>p-value</i>  | odds ratio |
| in gene                | 18                   | 41     | 40   | 8.7E-09         | 10.017     |
| 1kb                    | 22                   | 48     | 51   | 2.5E-11         | 11.324     |
| 2kb                    | 23                   | 50     | 53   | 1.9E-13         | 13.998     |
| 5kb                    | 27                   | 78     | 79   | 1.6E-12         | 8.465      |
| 10kb                   | 46                   | 136    | 131  | < 1E-16         | 9.770      |
