# Supplementary material for: The Role of piRNA-Mediated Epigenetic Silencing in the Population Dynamics of Transposable Elements in Drosophila melanogaster
Source: PubMed Central journal article supplement (PMC4456100; doi:10.1371/journal.pgen.1005269), 2015-06-04
Supplement: pgen.1005269.s022.pdf [file pgen.1005269.s022.pdf]

---

| H3K9me3 density vs TE frequency |         |                |
|---------------------------------|---------|----------------|
| developmental stage             | $\rho$  | <i>p-value</i> |
| Embryo 0-4hr                    | -0.0831 | 2.0E-02        |
| Embryo 4-8hr                    | -0.1516 | 2.0E-05        |
| Embryo 8-12hr                   | -0.0959 | 7.1E-03        |
| Embryo 12-16hr                  | -0.1209 | 6.8E-04        |
| Embryo 16-20hr                  | -0.1351 | 1.5E-04        |
| Embryo20-24hr                   | -0.1331 | 1.8E-04        |
| L1 larvae                       | -0.0617 | 8.3E-02        |
| L2 Larvae                       | -0.1110 | 1.8E-03        |
| Pupae                           | -0.0369 | 3.0E-01        |

---
