# Supplementary material for: The Role of piRNA-Mediated Epigenetic Silencing in the Population Dynamics of Transposable Elements in Drosophila melanogaster
Source: PubMed Central journal article supplement (PMC4456100; doi:10.1371/journal.pgen.1005269), 2015-06-04
Supplement: pgen.1005269.s023.pdf [file pgen.1005269.s023.pdf]

|                | ANOVA                     |                |             | Two sample <i>Mann-Whitney U</i> test for genes with nonzero H3K9me3 density |          |                | linear regression           |      | mixed linear regression     |                |
|----------------|---------------------------|----------------|-------------|------------------------------------------------------------------------------|----------|----------------|-----------------------------|------|-----------------------------|----------------|
|                | TE family as fixed effect |                |             | genic H3K9me3 median                                                         |          |                | TE family as fixed effect   |      | TE family as random effect  |                |
|                | TE frequency              | <i>p-value</i> |             | Not observed                                                                 | Observed | <i>p-value</i> | coefficient of TE frequency |      | coefficient of TE frequency |                |
|                |                           | TE family      | interaction |                                                                              |          |                | coefficient                 | sign | coefficient                 | <i>p-value</i> |
| Embryo 0-4hr   | 3.7E-01                   | 1.4E-01        | 3.4E-02     | 0.964                                                                        | 0.918    | 6.1E-02        | -5.8E-01                    | -    | -0.841                      | 1.3E-01        |
| Embryo 4-8hr   | 2.5E-06                   | 4.8E-07        | 9.1E-01     | 1.092                                                                        | 0.570    | 5.0E-06        | -5.9E-01                    | -    | -0.899                      | 2.6E-03        |
| Embryo 8-12hr  | 2.4E-03                   | 5.1E-06        | 7.5E-01     | 1.514                                                                        | 1.233    | 5.3E-03        | -3.5E-01                    | -    | -0.757                      | 3.1E-02        |
| Embryo 12-16hr | 1.1E-02                   | 1.3E-04        | 1.5E-02     | 1.047                                                                        | 0.707    | 8.4E-03        | 3.7E-01                     | +    | -0.426                      | 1.6E-01        |
| Embryo 16-20hr | 3.4E-02                   | 8.8E-05        | 2.2E-01     | 5.375                                                                        | 4.118    | 5.7E-03        | -1.1E-03                    | -    | -0.275                      | 1.5E-01        |
| Embryo 20-24hr | 5.0E-03                   | 5.5E-02        | 6.1E-02     | 2.984                                                                        | 2.661    | 1.7E-03        | -4.2E-01                    | -    | -0.385                      | 1.3E-02        |
| L1 larvae      | 5.4E-01                   | 3.5E-03        | 4.4E-02     | 1.354                                                                        | 1.251    | 2.9E-01        | 7.6E-02                     | +    | -0.100                      | 5.7E-01        |
| L2 Larvae      | 6.3E-04                   | 8.6E-03        | 3.4E-01     | 8.655                                                                        | 7.846    | 5.4E-03        | -5.8E-01                    | -    | -0.438                      | 1.1E-02        |
| Pupae          | 7.8E-01                   | 7.0E-01        | 2.8E-02     | 1.106                                                                        | 1.120    | 5.5E-01        | -1.4E-01                    | -    | 0.139                       | 4.4E-01        |
