# Supplementary material for: The Role of piRNA-Mediated Epigenetic Silencing in the Population Dynamics of Transposable Elements in Drosophila melanogaster
Source: PubMed Central journal article supplement (PMC4456100; doi:10.1371/journal.pgen.1005269), 2015-06-04
Supplement: pgen.1005269.s024.pdf [file pgen.1005269.s024.pdf]

| developmental stage | H3K9me3 density (per bp) |         | H3K9me3 density <sup>2</sup> |         | recombination rate (cM/Mbp) |         | recombination rate <sup>2</sup> |         |
|---------------------|--------------------------|---------|------------------------------|---------|-----------------------------|---------|---------------------------------|---------|
|                     | beta                     | p-value | beta                         | p-value | beta                        | p-value | beta                            | p-value |
| Embryo 0-4hr        | -0.0300                  | 6.1E-03 | 8.20E-04                     | 3.9E-02 | -0.1163                     | 1.0E-06 | 0.0138                          | 8.9E-06 |
| Embryo 4-8hr        | -0.0165                  | 9.7E-06 | 1.62E-04                     | 4.6E-04 | -0.1147                     | 1.1E-06 | 0.0139                          | 7.3E-06 |
| Embryo 8-12hr       | -0.0129                  | 5.7E-05 | 1.12E-04                     | 1.3E-03 | -0.1188                     | 5.0E-07 | 0.0143                          | 4.1E-06 |
| Embryo 12-16hr      | -0.0148                  | 1.3E-03 | 1.51E-04                     | 1.7E-02 | -0.1161                     | 9.7E-07 | 0.0139                          | 7.7E-06 |
| Embryo 16-20hr      | -0.0097                  | 6.2E-05 | 6.85E-05                     | 2.1E-03 | -0.1185                     | 5.5E-07 | 0.0142                          | 4.5E-06 |
| Embryo 20-24hr      | -0.0257                  | 1.1E-04 | 5.63E-04                     | 2.1E-03 | -0.1162                     | 8.9E-07 | 0.0139                          | 7.1E-06 |
| L1 larvae           | -0.0189                  | 2.2E-02 | NA                           | NA      | -0.1160                     | 1.1E-06 | 0.0138                          | 9.9E-06 |
| L2 Larvae           | -0.0095                  | 6.5E-04 | 1.01E-04                     | 2.1E-02 | -0.1206                     | 3.9E-07 | 0.0145                          | 3.1E-06 |
| Pupae               | -0.0503                  | 1.1E-02 | 6.10E-03                     | 1.0E-02 | -0.1179                     | 7.6E-07 | 0.0141                          | 6.7E-06 |

  

| all dev. Stages | no. of dev. stages |         | no. of dev. Stages <sup>2</sup> |         | recombination rate (cM/Mbp) |         | recombination rate <sup>2</sup> |          |
|-----------------|--------------------|---------|---------------------------------|---------|-----------------------------|---------|---------------------------------|----------|
|                 | beta               | p-value | beta                            | p-value | beta                        | p-value | beta                            | p-value  |
|                 | -0.0787            | 5.7E-04 | 0.0062                          | 4.3E-02 | -0.1160                     | 7.9E-07 | 0.014033                        | 5.22E-06 |
