# Supplementary material for: The Role of piRNA-Mediated Epigenetic Silencing in the Population Dynamics of Transposable Elements in Drosophila melanogaster
Source: PubMed Central journal article supplement (PMC4456100; doi:10.1371/journal.pgen.1005269), 2015-06-04
Supplement: pgen.1005269.s027.pdf [file pgen.1005269.s027.pdf]

| window size<br>with TE | female  |        |         |        | male    |        |         |        |
|------------------------|---------|--------|---------|--------|---------|--------|---------|--------|
|                        | minimum | median | maxmium | mean   | minimum | median | maxmium | mean   |
| <b>in gene</b>         | 0.0277  | 0.0453 | 0.0730  | 0.0475 | 0.0252  | 0.0479 | 0.0831  | 0.0471 |
| <b>1kb</b>             | 0.0267  | 0.0457 | 0.0686  | 0.0459 | 0.0248  | 0.0457 | 0.0686  | 0.0456 |
| <b>2kb</b>             | 0.0281  | 0.0468 | 0.0640  | 0.0471 | 0.0250  | 0.0460 | 0.0671  | 0.0457 |
| <b>5kb</b>             | 0.0345  | 0.0479 | 0.0633  | 0.0478 | 0.0297  | 0.0460 | 0.0623  | 0.0464 |
| <b>10kb</b>            | 0.0369  | 0.0472 | 0.0585  | 0.0475 | 0.0364  | 0.0477 | 0.0575  | 0.0473 |
